# Supplementary material for: Formation of organorhodium complexes via C–H bond activation of 1,3-di(phenylazo)benzene
Source: Royal Society of Chemistry journal article supplement (doi:10.1039/c1dt10247h), 2011-01-01
Supplement: c1dt10247h.pdf [file c1dt10247h.pdf]

## Electronic Supplementary Information

### **Formation of organorhodium complexes via C-H bond activation of 1,3-di(phenylazo)benzene. Structural diversity and catalytic potential**

Paramita Majumder,<sup>†</sup> Suparna Baksi,<sup>†</sup> Sarmistha Halder,<sup>†</sup>  
Haregewine Tadesse,<sup>‡</sup> Alexander J. Blake,<sup>‡</sup> Michael G. B. Drew,<sup>§</sup>  
and Samaresh Bhattacharya<sup>\*,†</sup>

**Reference R:**

- (R) (a) R. Fischer, H. Goris, M. Friedrich, M. Westerhausen, *J. Organomet. Chem.* 2009, **694**, 1107; (b) M. Stollenz, C. Große, F. Meyer, *Chem. Commun.* 2008, 1744; (c) R. Bomparola, R. P. Davies, S. Hornauer, A. J. P. White, *Angew. Chem. Int. Ed.* 2008, **47**, 5812; (d) M. E. Moret, P. Chen, *Organometallics* 2008, **27**, 4903; (e) C. E. Cooke, M. C. Jennings, M. J. Katz, R. K. Pomeroy, J. A. C. Clyburne, *Organometallics* 2008, **27**, 5777; (f) M. E. Moret, P. Chen, *Organometallics* 2008, **27**, 4903; (g) W. H. Monillas, G. P. A. Yap, K. H. Theopold, *Angew. Chem. Int. Ed. Engl.* 2007, **46**, 6692; (h) M. E. Garcia, A. Ramos, M. A. Ruiz, M. Lanfranchi, L. Marchio, *Organometallics* 2007, **26**, 6197; (i) A. L. Keen, M. Doster, S. A. Johnson, *J. Am. Chem. Soc.* 2007, **129**, 810; (j) M. R. Hassan, G. Hogarth, G. M. G. Hossain, S. E. Kabir, A. K. Raha, M. S. Saha, D. A. Tocher, *Organometallics* 2007, **26**, 6473; (k) A. L. Keen, S. A. Johnson, *J. Am. Chem. Soc.* 2006, **128**, 1806; (l) A. C. Albeniz, P. Espinet, O. Lopez-Cimas, B. Martin-Ruiz, *Chem. Eur. J.*, 2005, **11**, 242; (m) M. J. L. Tschan, F. Cherioux, L. Karmazin-Brelot, G. Suss-Fink, *Organometallics* 2005, **24**, 1974; (n) D. Donnecke, J. Wunderle, W. Imhof, *J. Organomet. Chem.* 2004, **689**, 585; (o) A. C. Albeniz, P. Espinet, B. Martin-Ruiz, *Chem. Eur. J.*, 2001, **7**, 2481; (p) U. Piarulli, C. F. N. R. G. Gervasio, D. Viterbo, *Inorg. Chem.* 1998, **37**, 5142; (q) Z. Majeed, W. R. McWhinnie, K. Paxton, T. A. Hamor, *J. Chem. Soc., Dalton Trans.* 1998, 3947; (r) U. Piarulli, C. F. N. R. G. Gervasio, D. Viterbo, *Inorg. Chem.* 1998, **37**, 5142; (s) I. Ara, L. R. Falvello, J. Fornies, E. Lalinde, A. Martin, F. Martinez, M. T. Moreno, *Organometallics* 1997, **16**, 5392; (t) J. M. Casas, J. Formes, A. Martin, B. Menjon, M. Tomas, *Polyhedron* 1996, **15**, 3599; (u) E. Solari, F. Musso, E. Galo, C. Floriani, N. Re, A. Chiesi-Villa, C. Rizzoli, *Organometallics* 1995, **14**, 2265; (v) A. Klose, E. Solari, C. Floriani, A. Chiesi-Villa, C. Rizzoli, N. Re, *J. Am. Chem. Soc.* 1994, **116**, 9123; (w) R. A. Heintz, R. L. Ostrander, A. L. Rheingold, K. H. Theopold, *J. Am. Chem. Soc.* 1994, **116**, 11387; (x) P. Briard, J. A. Cabeza, A. Llamazares, L. Ouahab, V. Riera, *Organometallics* 1993, **12**, 1006; (y) B. Hessen, J. K. F. Buijink, A. Meetsma, J. H. Teuben, G. Helgesson, M. Haakansson, S. Jagner, A. L. Spek, *Organometallics* 1993, **12**, 2268; (z) K. H. Theopold, J. Silvestre, E. K. Byrne, D. S. Richeson, *Organometallics* 1989, **8**, 2001.

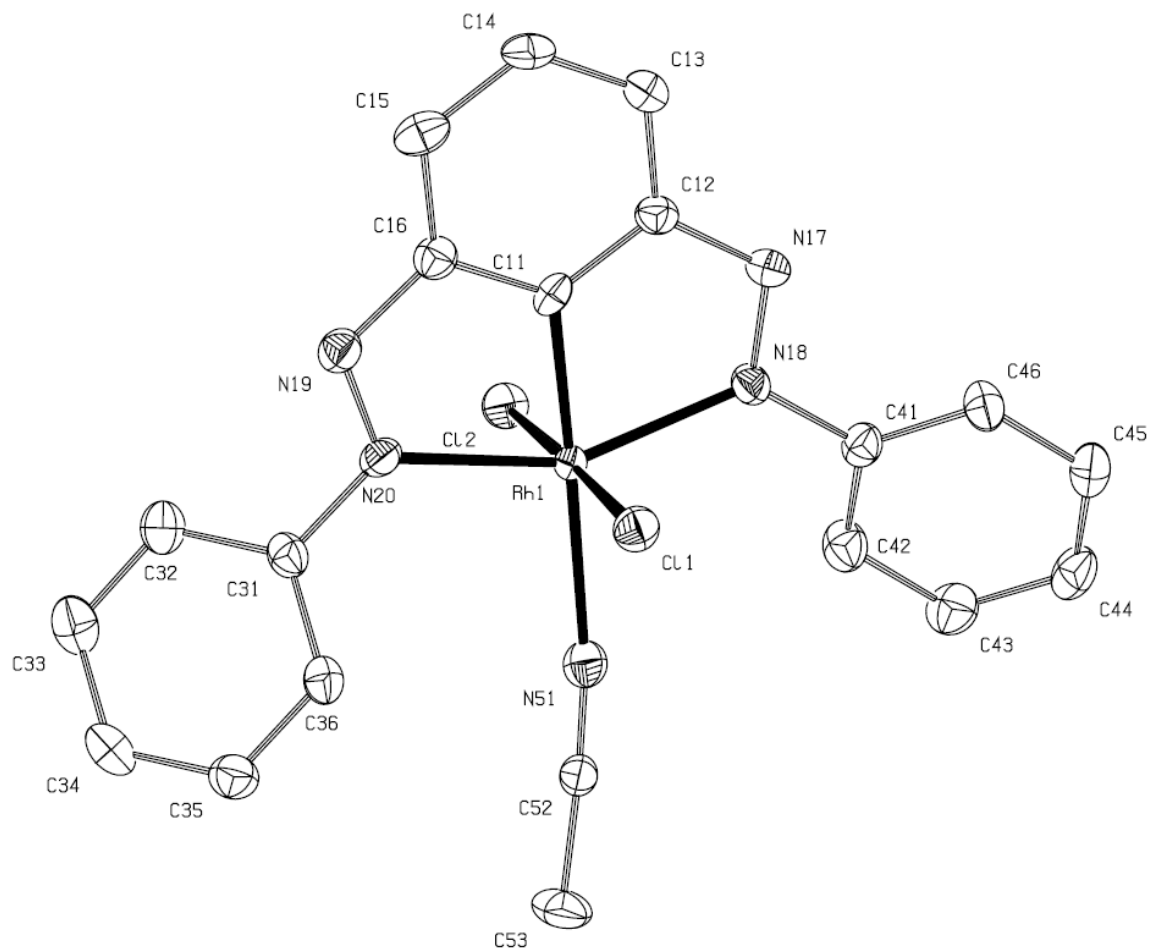

**Fig. S1.** Molecular structure of complex **3**. Hydrogen atoms bound to carbon atoms are omitted for clarity. Selected bond lengths (Å) and angles (°): Rh1-C11, 2.3437(15); Rh1-Cl2, 2.3395(15); Rh1-N18, 2.092(5); Rh1-N20, 2.089(5); Rh1-N51, 2.210(5); Rh1-C11, 1.877(6); N17-N18, 1.282(7); N19-N20, 1.290(7); Cl1-Rh1-Cl2, 177.54(5); N18-Rh1-N20, 154.30(19); N18-Rh1-N51, 105.25(19); N18-Rh1-C11, 76.9(2); N20-Rh1-N51, 100.45(19); N20-Rh1-C11, 77.4(2).

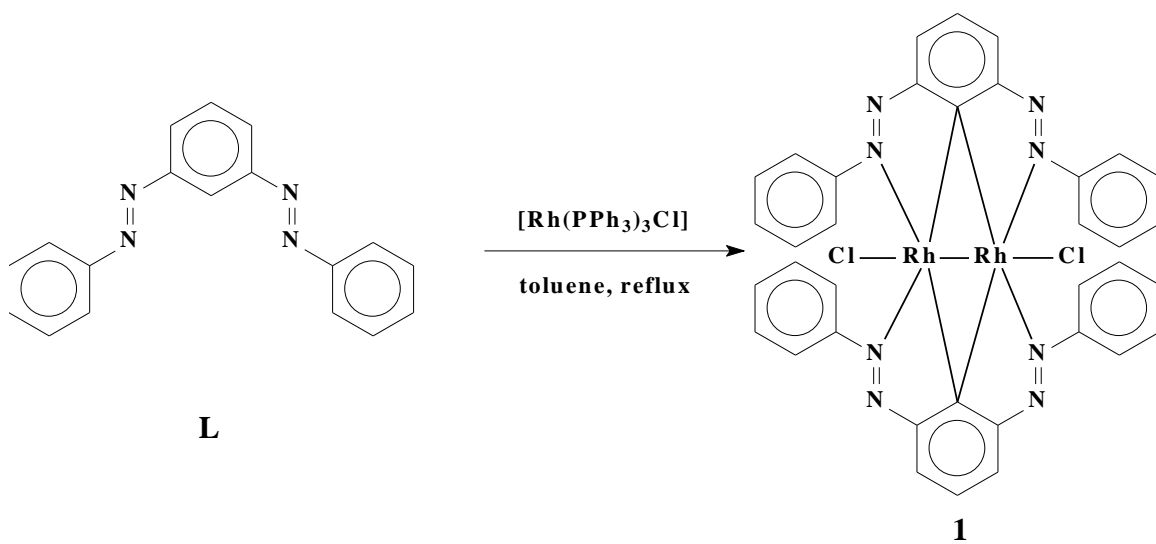

**Scheme S1.** Formation of complex **1**.

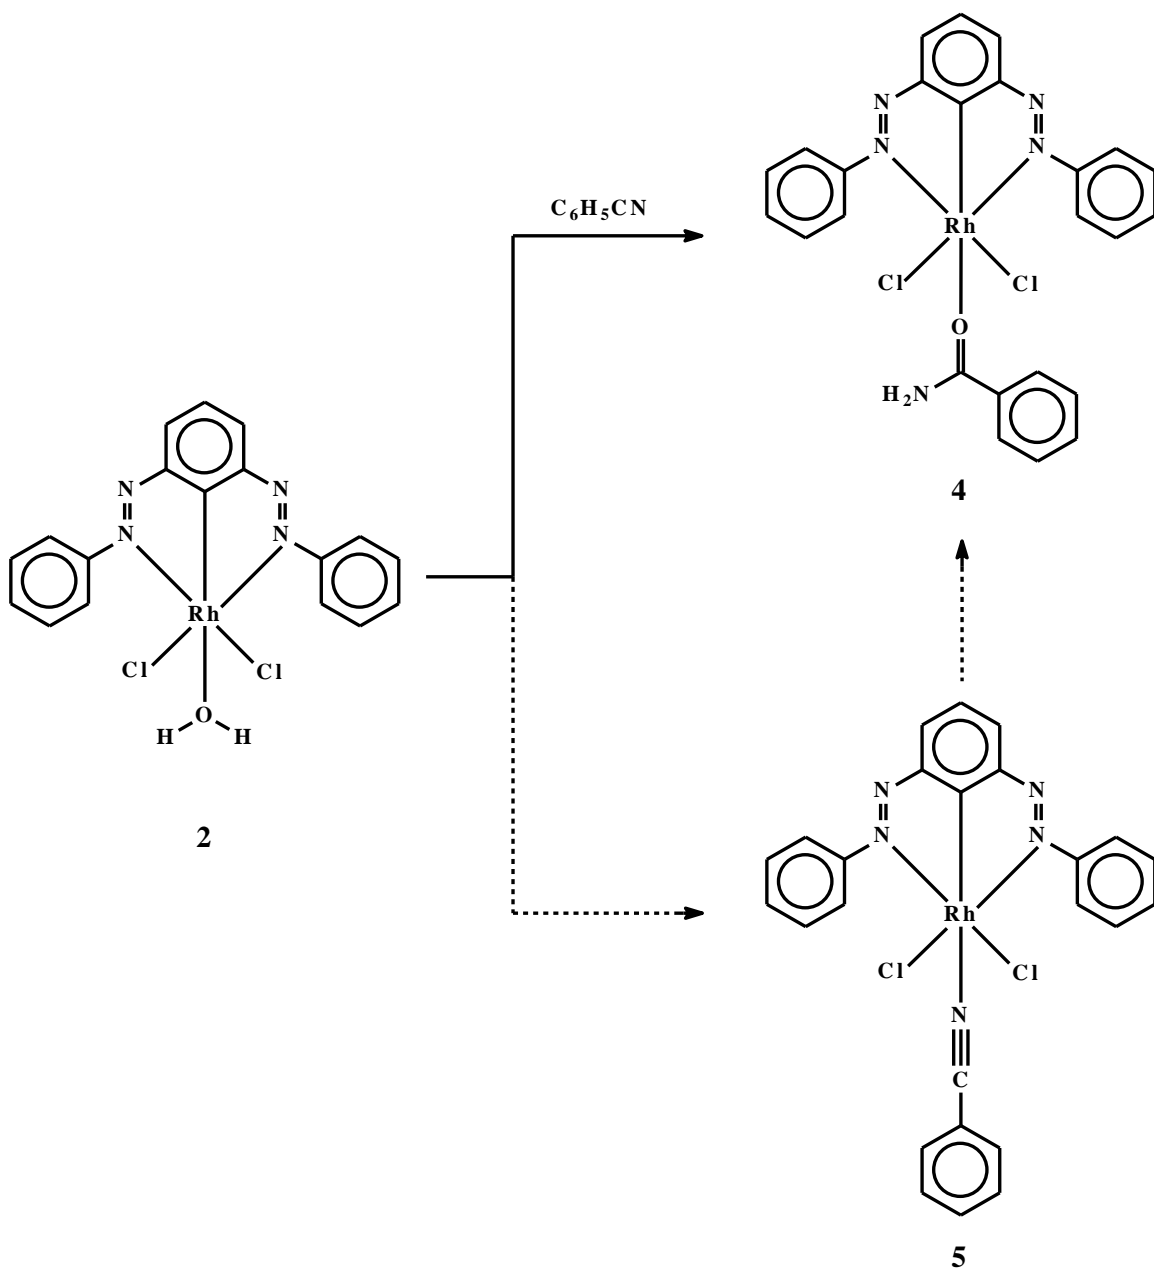

**Scheme S2.** Formation of complex 4 and complex 5.

## Method of preparation

**1,3-di(phenylazo)benzene:** 1,3-phenylenediamine (4 g, 0.04 mol) and NaOH (3 g, 0.08 mol) were grinded well, nitrobenzene (10 g, 0.08 mol) was added to the mixture and made a paste. The paste was heated gently till orange gas evolved vigorously. The mass became solid. It was cooled and extracted with benzene. The solvent was then evaporated to give a solid mass, which was subjected to purification by thin layer chromatography on a silica plate with 1:10 benzene-hexane as the eluant. Orange band separated, which was extracted with acetonitrile. Upon slow evaporation of the orange extract 1,3-di(phenylazo)benzene was obtained. Yield: 7 g (70%). Anal. Calcd for C<sub>18</sub>H<sub>14</sub>N<sub>4</sub>: C, 75.52; H, 4.89; N, 19.58. Found: C, 75.25; H, 4.37; N, 19.79. Mass spectral data (positive ion ES): *m/z* 287(M+H). <sup>1</sup>H NMR (CDCl<sub>3</sub>, 25° C): δ 8.45 (s, 1H, C1), 8.05 (d, *J* = 6.6 Hz, 2H, C3, C5), 7.97 (d, *J* = 7.3 Hz, 4H, C8, C12, C14, C18), 7.68 (t, *J* = 7.8 Hz, 1H, C4), 7.48-7.57\* (6H) (\* overlapping signal).

**Complex 1:** To a solution of 1,3-di(phenylazo)benzene (31 mg, 0.11 mmol) in toluene (40 ml) was added [Rh(PPh<sub>3</sub>)<sub>3</sub>Cl] (100 mg, 0.11 mmol). The resulting mixture was then heated at reflux for 3 h under a dinitrogen atmosphere to yield a dark brown solution. The solvent was then evaporated to give a solid mass, which was subjected to purification by thin layer chromatography on a silica plate. With benzene as the eluant, an olive green band separated, which was extracted with acetonitrile. Evaporation of this extract gave complex **1** as a dark crystalline solid. Yield: 30 mg (30%). Anal. Calcd for C<sub>36</sub>H<sub>26</sub>N<sub>8</sub>Cl<sub>2</sub>Rh<sub>2</sub>: C, 51.00; H, 3.07; N, 13.22. Found: C, 51.17; H, 2.95; N, 13.04. Mass spectral data (positive ion ES): *m/z* 774 (M-2Cl). <sup>1</sup>H NMR (CDCl<sub>3</sub>, 25° C): δ 7.53 (d, *J* = 7.7 Hz, 4H, C3, C5, C3' and C5'), 7.49 (d, *J* = 7.9 Hz, 8H, C12, C8, C18, C14, C12', C8', C14' and C18'), 7.39 (t, *J* = 7.4 Hz, 4H, C10, C16, C10', C16'), 7.17 (t, *J* = 7.9 Hz, 8H, C9, C11, C17, C15, C9', C11', C17', C15'), 6.95 (t, *J* = 7.6 Hz, 2H, C4, C4') (the carbon atoms of the second azo-ligand are marked with '). <sup>13</sup>C NMR (CDCl<sub>3</sub>, 25° C): δ 160.65, 153.24, 133.61, 131.55, 128.12, 124.62, 124.37, 117.83. IR (KBr, *v/cm*<sup>-1</sup>): 1740, 1645, 1580, 1458, 1412, 1383, 1327, 1306, 1259, 1167, 1080, 1029, 920, 797, 764, 717, 689, 596, 575, 530, 451.

**Complex 2:** To a solution of 1,3-di(phenylazo)benzene (109 mg, 0.40 mmol) in ethanol (40 ml) was added  $\text{RhCl}_3 \cdot 3\text{H}_2\text{O}$  (100 mg, 0.38 mmol). The resulting mixture was then heated at reflux for 3 h to yield a red solution. The solvent was then evaporated to give a solid mass, which was subjected to purification by recrystallization from dichloromethane-ethanol solution affording complex **2** as a crystalline orange solid. Yield: 110 mg (60%). Anal. Calcd for  $\text{C}_{18}\text{H}_{15}\text{N}_4\text{O}_1\text{Cl}_2\text{Rh}$ : C, 45.30; H, 3.10; N, 11.70. Found: C, 47.38; H, 3.06; N, 11.94.  $^1\text{H}$  NMR ( $\text{CDCl}_3$ , 25° C):  $\delta$  8.39 (d,  $J = 7.9$  Hz, 2H, C3, C5), 8.06 (d,  $J = 7.8$  Hz, 4H, C8, C12, C14, C18), 7.70 (t,  $J = 7.9$  Hz, 2H, C10, C16), 7.43-7.57\* (5H).  $^{13}\text{C}$  NMR ( $\text{CDCl}_3$ , 25° C):  $\delta$  160.49, 152.45, 131.88, 130.29, 129.12, 128.98, 125.72, 123.93. IR (KBr,  $\nu/\text{cm}^{-1}$ ): 1576, 1493, 1457, 1326, 1306, 1260, 1155, 1023, 794, 762, 716, 689, 600, 574, 526, 458.

**Complex 3:** This complex was obtained as an orange crystalline solid upon evaporation of solvent (takes about 2 h under ambient condition) from a solution of complex **2** (10 mg) in acetonitrile (20 ml). Yield: Quantitative. Anal. Calcd for  $\text{C}_{20}\text{H}_{16}\text{N}_5\text{Cl}_2\text{Rh}$ : C, 48.00; H, 3.20; N, 14.00. Found: C, 47.85; H, 3.36; N, 13.94.  $^1\text{H}$  NMR ( $\text{CDCl}_3$ , 25° C):  $\delta$  8.39 (d,  $J = 7.9$  Hz, 2H, C3, C5), 8.09 (d,  $J = 7.5$  Hz, 4H, C8, C12, C14, C18), 7.67 (t,  $J = 7.9$  Hz, 2H, C10, C16), 7.46-7.57\* (5H), 2.19 (s, 3H,  $\text{CH}_3\text{CN}$ ).  $^{13}\text{C}$  NMR ( $\text{CDCl}_3$ , 25° C):  $\delta$  160.51, 152.48, 131.91, 130.35, 129.01, 128.84, 125.75, 123.94, 118.32, 2.83. IR (KBr,  $\nu/\text{cm}^{-1}$ ): 2361, 1580, 1458, 1327, 1306, 1259, 1167, 1080, 1030, 920, 797, 764, 717, 687, 575, 528, 455.

**Complex 4:** This complex was obtained as an orange crystalline solid upon evaporation (takes about 7 days under ambient condition) of solvent from a solution of complex **2** (10 mg) in benzonitrile (20 ml). Yield: Quantitative. Anal. Calcd for  $\text{C}_{25}\text{H}_{20}\text{N}_5\text{O}_1\text{Cl}_2\text{Rh}$ : C, 51.70; H, 3.40; N, 12.10. Found: C, 51.85; H, 3.36; N, 12.94.  $^1\text{H}$  NMR ( $\text{CDCl}_3$ , 25° C):  $\delta$  8.39 (d,  $J = 7.7$  Hz, 2H, C3, C5), 8.16 (d,  $J = 8.5$  Hz, 4H, C8, C12, C14, C18), 7.87 (d,  $J = 7.0$  Hz, 2H, *ortho*-phenyl of benzamide), 7.46-7.70\* (10H), 6.27 (s, 2H, amide  $\text{NH}_2$  of benzamide).  $^{13}\text{C}$  NMR ( $\text{CDCl}_3$ , 25° C):  $\delta$  160.45, 152.44, 133.60, 132.78, 132.42, 131.79, 130.19, 129.30, 128.94, 128.88, 127.62, 125.60, 123.82. IR (KBr,  $\nu/\text{cm}^{-1}$ ): 1647, 1579, 1481, 1458, 1327, 1306, 1254, 1171, 1080, 1032, 802, 764, 721, 689, 600, 575, 525, 452.

**Complex 5:** This complex was obtained as an orange crystalline solid upon evaporation (takes about a day under ambient condition) of solvents from a solution of complex **2** (10 mg) in 19:1 acetone-benzonitrile (20 mL). Yield: Quantitative. Anal. Calcd for  $C_{25}H_{18}N_5Cl_2Rh$ : C, 53.40; H, 3.20; N, 12.50. Found: C, 53.51; H, 3.67; N, 12.94.  $^1H$  NMR ( $CDCl_3$ , 25° C):  $\delta$  8.40 (d,  $J = 7.9$  Hz, 2H, C3, C5), 8.14 (d,  $J = 7.0$  Hz, 4H, C8, C12, C14, C18), 7.65-7.70\* (4H), 7.46-7.57\* (8H).  $^{13}C$  NMR ( $CDCl_3$ , 25° C):  $\delta$  160.32, 152.31, 132.67, 131.93, 131.81, 130.25, 129.41, 128.89, 128.77, 127.66, 125.67, 123.78, 117.34. IR (KBr,  $\nu/cm^{-1}$ ): 2337, 1561, 1458, 1327, 1306, 1257, 1173, 1080, 1031, 800, 764, 719, 689, 576, 526, 451.

Selected crystallographic data, for complex **4**:  $C_{25}H_{20}Cl_2N_5ORh$ ,  $M_r = 580.27$ , monoclinic, space group  $P2_1/c$ ,  $a = 12.1868(2)$  Å,  $b = 12.0880(2)$  Å,  $c = 15.7543(2)$  Å,  $\beta = 92.597(6)^\circ$ ,  $V = 2318.5(2)$  Å<sup>3</sup>,  $Z = 4$ ,  $\mu = 0.997$  mm<sup>-1</sup>,  $T = 150$  K,  $\lambda = 0.71073$  Å,  $R_I = 0.0543$ ,  $wR_2 = 0.1530$ , GOF = 0.80

Selected bond lengths (Å) and angles (deg) of complex **4**: Rh1-Cl1, 2.3292(13); Rh1-Cl2, 2.3335(12); Rh1-N1, 2.102(4); Rh1-N4, 2.062(4); Rh1-O1, 2.225(4); Rh1-C21, 1.878(5); N1-N2, 1.277(5); N3-N4, 1.277(5); O1-C4, 1.207(7); N5-C4, 1.402(9); Cl1-Rh1-Cl2, 175.76(5); N1-Rh1-N4, 153.99(14); N1-Rh1-O1, 105.04(13); N1-Rh1-C21, 77.08(18); O1-Rh1-C21, 175.52(18); N4-Rh1-C1, 76.70(14).

Selected crystallographic data, for complex **5**  $C_{25}H_{18}Cl_2N_5Rh$ ,  $M_r = 562.25$ , monoclinic, space group  $P2_1/c$ ,  $a = 11.2704(2)$  Å,  $b = 13.3655(2)$  Å,  $c = 15.7056(2)$  Å,  $\beta = 89.900(1)^\circ$ ,  $V = 2365.80(6)$  Å<sup>3</sup>,  $Z = 4$ ,  $\mu = 0.971$  mm<sup>-1</sup>,  $T = 296$  K,  $\lambda = 0.71073$  Å,  $R_I = 0.0300$ ,  $wR_2 = 0.1615$ , GOF = 0.65

Selected bond lengths (Å) and angles (deg) of complex **5**: Rh1-Cl1, 2.3385(8); Rh1-Cl2, 2.3284(10); Rh1-N2, 2.106(3); Rh1-N4, 2.075(3); Rh1-N5, 2.212(3); Rh1-C1, 1.877(3); N1-N2, 1.285(4); N3-N4, 1.269(3); N5-C19, 1.142(4); Cl1-Rh1-Cl2, 177.23(3); N2-Rh1-N4, 153.54(11); N2-Rh1-N5, 104.51(11); N2-Rh1-C1, 76.86(15); N4-Rh1-N5, 101.94(10); N4-Rh1-C1, 76.70(14).
